CORRECTION

# Correction: Synthesis of novel phenoxyacetohydrazide compounds and evaluation therapeutic potential exhibit as anti-inflammatory and anti-angiogenic

Yasser Hussein Issa Mohammed, Ahmed Hassen Shntaif, Saad Alghamdi, Ahd A. Mansour, Naeem F. Qusty, Azhar S. Sindi, Ahmad O. Babalghith, Ghazi A. Bamagous, Eman Adnan Abu-Seer

There is an error in affiliation 3 for author Saad Alghamdi. The correct affiliation 3 is: Department of Clinical Laboratory Sciences, Faculty of Applied Medical Sciences, Umm Al-Qura University, Makkah, Saudi Arabia.

## Reference

1. Mohammed YHI, Shntaif AH, Alghamdi S, Mansour AA, Qusty NF, Sindi AS, et al. Synthesis of novel phenoxyacetohydrazide compounds and evaluation therapeutic potential exhibit as anti-inflammatory and anti-angiogenic. PLoS One. 2025;20(9):e0330731. <https://doi.org/10.1371/journal.pone.0330731> PMID: [41004560](https://pubmed.ncbi.nlm.nih.gov/41004560/)

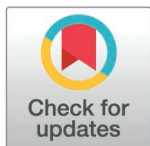

## OPEN ACCESS

**Citation:** Mohammed YHI, Shntaif AH, Alghamdi S, Mansour AA, Qusty NF, Sindi AS, et al. (2025) Correction: Synthesis of novel phenoxyacetohydrazide compounds and evaluation therapeutic potential exhibit as anti-inflammatory and anti-angiogenic. PLoS One 20(12): e0339331. <https://doi.org/10.1371/journal.pone.0339331>

**Published:** December 18, 2025

**Copyright:** © 2025 Mohammed et al. This is an open access article distributed under the terms of the [Creative Commons Attribution License](https://creativecommons.org/licenses/by/4.0/), which permits unrestricted use, distribution, and reproduction in any medium, provided the original author and source are credited.
